# Supplementary material for: Oxidative stress gene expression, DNA methylation, and gut microbiota interaction trigger Crohn’s disease: a multi-omics Mendelian randomization study
Source: Springer Nature journal article supplement (doi:10.1186/s12916-023-02878-8), 2023-05-11

## A Chromatin state

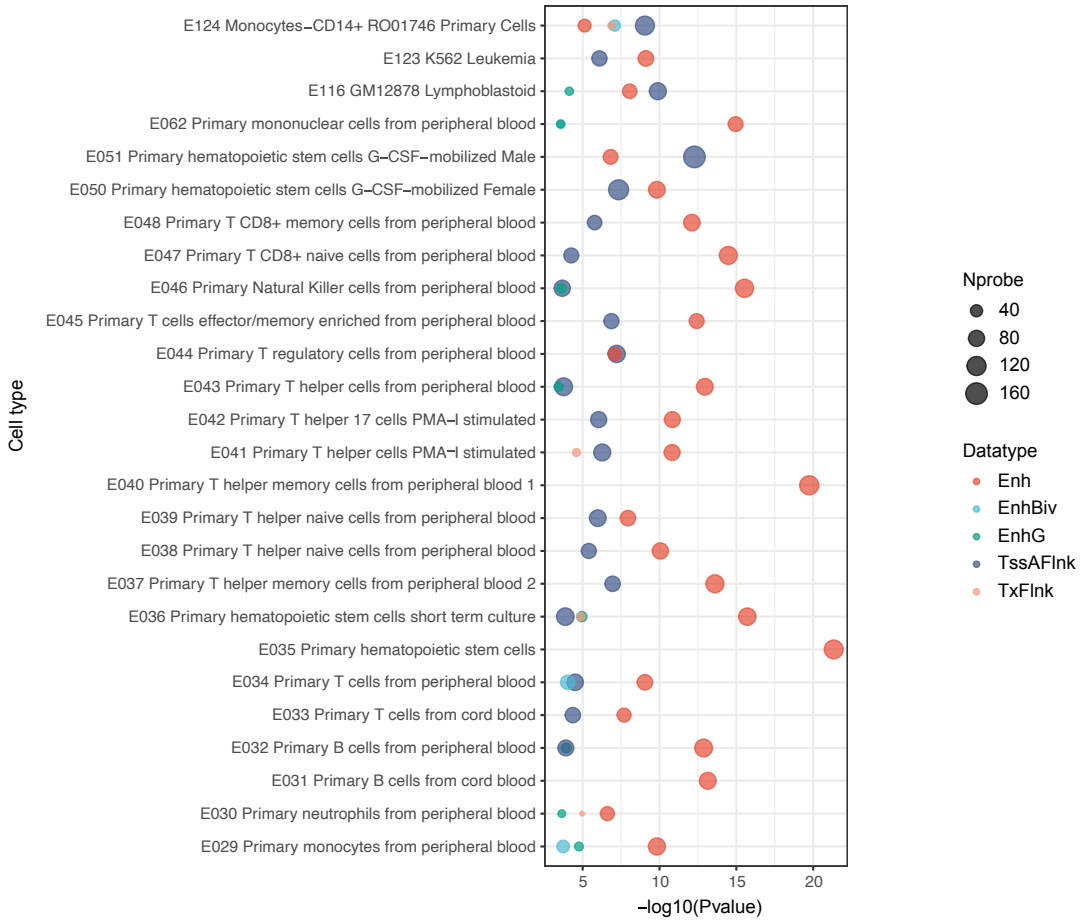

## B Histone marker

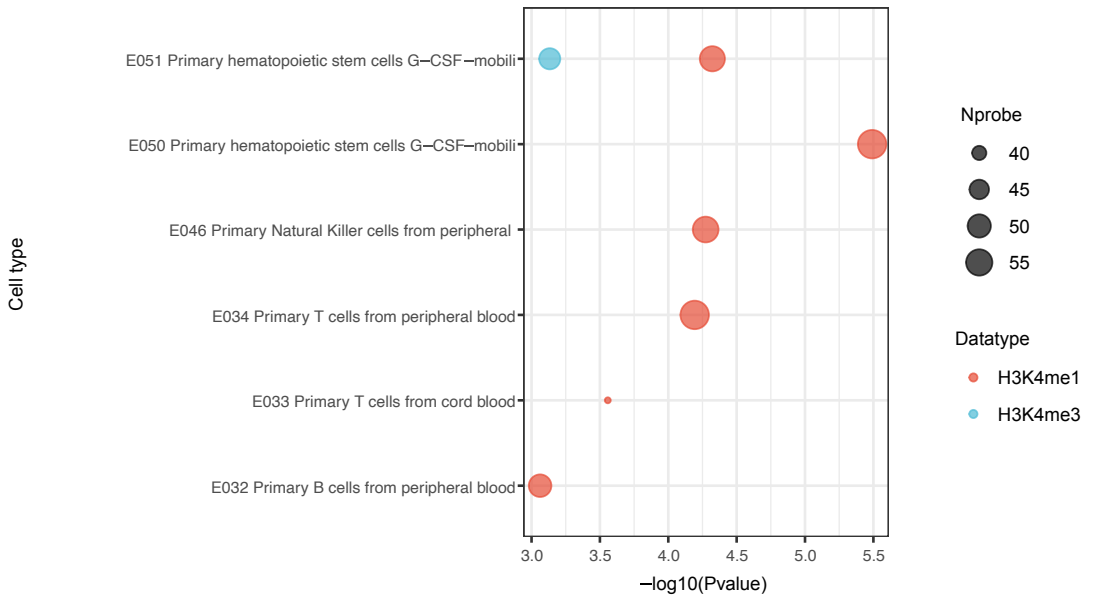

Supplement: MOESM3 [file 25346432]
